# Supplementary material for: Genetic Mapping of MAPK-Mediated Complex Traits Across S. cerevisiae
Source: PLoS Genet. 2015 Jan 8;11(1):e1004913. doi: 10.1371/journal.pgen.1004913 (PMC4287466; doi:10.1371/journal.pgen.1004913)
Supplement: S6 Table — Copy number of ENA variants in the RR parent strains. For each strain sequences were aligned to the coding sequence of ENA2 (SGD S288c YDR039c) or ENA6 (GenBank: FJ228230.1). We calculated the median coverage of these two variants and compared it to the median coverage of chromosome IV, on which both are located, in order to determine their copy number. (XLSX) [file pgen.1004913.s010.xlsx]

## Sheet: ENA CN
Supporting Table S6: Copy number of ENA variants in the RR parent strains
Strain	chrIV coverage	ENA2 coverage	ENA2 copy number	ENA6 coverage	ENA6 copy number
YPS1009	70	0	0	6	0.0857143
I14	73	173	2.36986	20	0.273973
Y10	216	2	0.00925926	214	0.990741
PW5	421	3	0.00712589	382	0.907363
273614x	182	348	1.91209	4	0.021978
YJM981	173	1007.5	5.8237	76	0.439306
CBS2888	31	2	0.0645161	24	0.774194
Clib219	143	1	0.00699301	103	0.72028
M22	41	68	1.65854	1	0.0243902
YJM269	120	197	1.64167	2	0.0166667
NC-02	61	3	0.0491803	47	0.770492
YJM454	179	2	0.0111732	142	0.793296
