# Supplementary material for: Genetic Mapping of MAPK-Mediated Complex Traits Across S. cerevisiae
Source: PLoS Genet. 2015 Jan 8;11(1):e1004913. doi: 10.1371/journal.pgen.1004913 (PMC4287466; doi:10.1371/journal.pgen.1004913)
Supplement: S8 Table — Round-robin MAT QTL. QTL identified in multiple conditions are indicated in bold. We excluded the 1M NaCl selections for Cross 11 from this analysis as this selection was stringent for this cross and few cells grew under this condition. While comparison of the MATa and MATx selections did identify shared QTL, QTL not shared between the two mating types are likely false positives resulting from the small number of segregants in the mapping pool. (XLSX) [file pgen.1004913.s012.xlsx]

## Sheet: MAT RR QTL
Supporting Table S8: Round-robin MAT QTL
Cross	Condition	Chromosome	LOD score	Max LOD position	Lower bound of QTL	Upper bound of QTL	Candidate QTG
Cross 2	YPD	chr12	8.8	1040100	1027900	1051000	SST2
Cross 2	1M NaCl	chr12	8.23	1041700	1026000	1050600	SST2
Cross 2	15mM Caffeine	chr12	6.27	1045100	1021500	1050600	SST2
Cross 2	20mM Caffeine	chr12	5.81	1049800	987900	1051000	SST2
Cross 3	0.5M NaCl	chr04	9.49	884100	855600	907000	MSS4
Cross 4	0.5M NaCl	chr12	12.3	18800	14900	25300
Cross 4	1M NaCl	chr04	6.89	364800	343300	392800
Cross 4	1M NaCl	chr12	6.58	15000	14900	31600
Cross 4	1M NaCl	chr15	9.14	420900	304500	443300
Cross 5	YPD	chr08	6.12	109300	84300	140100	GPA1
Cross 5	1M NaCl	chr08	6.75	101300	14900	146400	GPA1
Cross 5	20mM Caffeine	chr08	7.43	108800	89400	140400	GPA1
Cross 8	YPD	chr06	9.46	18200	14900	23300
Cross 8	YPD	chr08	11.85	31100	19100	51800
Cross 8	YPD	chr16	6.19	399000	377500	422700
Cross 8	15mM Caffeine	chr11	7.68	65400	54700	74200	TOR2
Cross 8	20mM Caffeine	chr11	7.04	62800	49800	72900	TOR2
Cross 9	20mM Caffeine	chr08	5.01	45100	14900	80600
Cross 10	YPD	chr08	8.58	94200	80300	121900	GPA1
Cross 10	1M NaCl	chr08	5.87	105400	87000	120700	GPA1
Cross 10	15mM Caffeine	chr08	7.58	93900	83500	103900	GPA1
Cross 10	15mM Caffeine	chr13	5.62	41500	14900	78900
Cross 10	20mM Caffeine	chr08	5.67	94100	73300	122900	GPA1
Cross 10	20mM Caffeine	chr13	5.84	58900	14900	90200
Cross 11	0.5M NaCl	chr07	8.4	104900	63400	122400
QTL identified in multiple conditions.
