# Supplementary material for: Genetic Mapping of MAPK-Mediated Complex Traits Across S. cerevisiae
Source: PLoS Genet. 2015 Jan 8;11(1):e1004913. doi: 10.1371/journal.pgen.1004913 (PMC4287466; doi:10.1371/journal.pgen.1004913)
Supplement: S9 Table — Plasmids. All yeast expression vectors carry the AmpR gene. Plasmids are available on Addgene. (XLSX) [file pgen.1004913.s013.xlsx]

## Sheet: Plasmids
Supporting Table S9: Plasmids
Plasmid Name	Description	Selection marker	Addgene #
p416 1-F GW	pRS416 carrying Gateway cassette for a single insert	URA3	58543
p41Nat 1-F GW	CEN vector with clonNat resistance marker for single Gateway insertion	NatMX	58546
p41Neo 1-F GW	CEN vector with G418 resistance marker for single Gateway insertion	KanMX	58545
p41Hyg 1-F GW	CEN vector with Hygromycin resistance marker for single Gateway insertion	HphMX	58547
p426 1-F GW	pRS426 carrying Gateway cassette for a single insert	URA3	58548
p42Nat 1-F GW	Multicopy with clonNat resistance marker for single Gateway insertion	NatMX	58549
p42Neo 1-F GW	Multicopy with G418 resistance marker for single Gateway insertion	KanMX	58550
p42Hyg 1-F GW	Multicopy vector with Hygromycin resistance marker for single Gateway insertion	HphMX	58551
p416 3-F GW	pRS416 carrying Gateway cassette for three inserts	URA3	58552
p41Nat 3-F GW	CEN vector with clonNat resistance marker for triple Gateway insertion	NatMX	58553
p41Neo 3-F GW	CEN vector with G418 resistance marker for triple Gateway insertion	KanMX	58554
p41Hyg 3-F GW	CEN vector with Hygromycin resistance marker for triple Gateway insertion	HphMX	58555
p426 3-F GW	pRS426 carrying Gateway cassette for three inserts	URA3	58556
p42Nat 3-F GW	Multicopy with clonNat resistance marker for triple Gateway insertion	NatMX	58557
p42Neo 3-F GW	Multicopy with G418 resistance marker for triple Gateway insertion	KanMX	58558
p42Hyg 3-F GW	Multicopy vector with Hygromycin resistance marker for triple Gateway insertion	HphMX	58559
P4-P1r Ste2pCitrine	pDONR P4-P1r carrying the STE2 promoter Citrine fusion	(Bacteria: KAN)	58560
P2r-P3 Ste3pmCherry	pDONR P2r-P3 carrying the STE3 promoter mCherry fusion (reverse orientation)	(Bacteria: KAN)	58561
pD221 Cyc1_term	pDONR221 carrying the Cyc1 terminator	(Bacteria: KAN)	58562
p41Nat MagicFluor	p41Nat carrying both mating type markers buffered by the Cyc1 terminator	NatMX	58563
p41Neo MagicFluor	p41Neo carrying both mating type markers buffered by the Cyc1 terminator	KanMX	58564
